# Supplementary material for: Reporting of late-onset immune-related adverse events with immune checkpoint inhibitors in VigiBase
Source: PubMed Central journal article supplement — J Immunother Cancer. 2024 Nov 3;12(11):e009902. doi: 10.1136/jitc-2024-009902 (PMC11535709; doi:10.1136/jitc-2024-009902), 2024-11-03
Supplement: jitc-12-11-s001.pdf [file jitc-12-11-s001.pdf]

**Supplementary Figure 1** Flowchart summarising the selection of individual case safety reports included in the study population

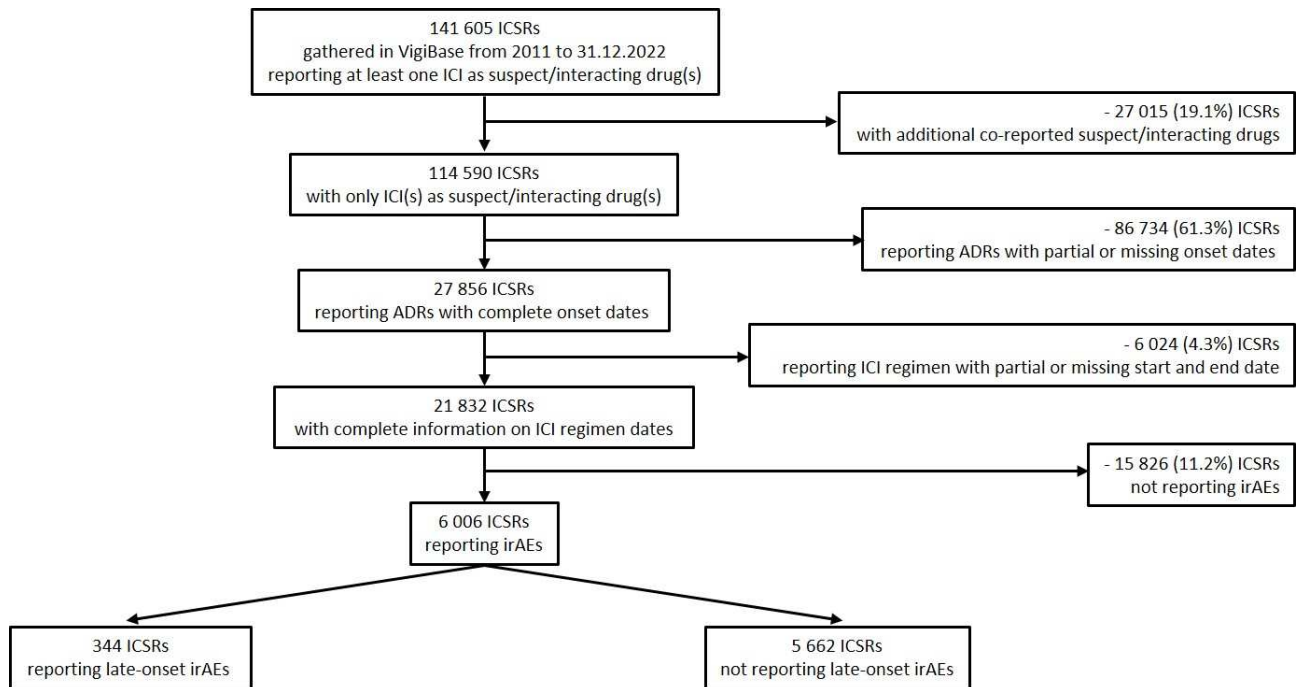

*Abbreviations:* ICSRs, individual case safety reports; ICI, immune checkpoint inhibitor; ADRs, adverse drug reactions; irAEs, immune-related adverse events

**Supplementary Table 1** List of events containing or ending with '-itis' considered for the selection of immune-related adverse events associated with ICI treatment based on a consensus among authors, comprising clinical pharmacologists

| <b>Preferred terms (according to MedDRA version 26.0)</b> |
|-----------------------------------------------------------|
| Acrodermatitis enteropathica                              |
| Acute haemorrhagic ulcerative colitis                     |
| Acute interstitial pneumonitis                            |
| Adrenalitis                                               |
| Allergic colitis                                          |
| Alveolitis                                                |
| Angular cheilitis                                         |
| Appendicitis                                              |
| Atrophic vulvovaginitis                                   |
| Blepharitis                                               |
| Bronchiolitis                                             |
| Bursitis                                                  |
| Cellulitis                                                |
| Cheilitis                                                 |
| Cholangitis                                               |
| Cholecystitis                                             |
| Cholecystitis chronic                                     |
| Chorioretinitis                                           |
| Chronic hepatitis                                         |
| Colitis ischaemic                                         |
| Conjunctivitis                                            |
| Conjunctivitis allergic                                   |
| Cystitis haemorrhagic                                     |
| Cystitis noninfective                                     |
| Dermatitis acneiform                                      |
| Dermatitis allergic                                       |
| Dermatitis exfoliative                                    |
| Dermatitis exfoliative generalised                        |
| Dermatitis psoriasiform                                   |
| Dermo-hypodermitis                                        |
| Diverticulitis                                            |
| Duodenitis                                                |
| Encephalitis toxic                                        |
| Enterocolitis haemorrhagic                                |
| Eosinophilic bronchitis                                   |
| Eosinophilic colitis                                      |

Folliculitis  
Gastritis  
Gastritis erosive  
Gastritis haemorrhagic  
Gastroenteritis  
Gastroenteritis eosinophilic  
Gingivitis  
Glossitis  
Granulomatous pneumonitis  
Haemorrhagic erosive gastritis  
Hand dermatitis  
Hepatitis acute  
Hepatitis cholestatic  
Hepatitis fulminant  
Hepatitis toxic  
Hidradenitis  
Hypersensitivity pneumonitis  
Hypophysitis  
Iridocyclitis  
Iritis  
Keratitis  
Keratouveitis  
Lymphadenitis  
Lymphangitis  
Meningitis  
Meningitis aseptic  
Meningoradiculitis  
Mesenteric panniculitis  
Nasopharyngitis  
Necrotising colitis  
Necrotising myositis  
Nephritis allergic  
Neurodermatitis  
Noninfective gingivitis  
Oedematous pancreatitis  
Oesophagitis  
Oligoarthritis  
Orbital myositis  
Orchitis  
Osteitis deformans

Osteoarthritis  
Osteomyelitis  
Pachymeningitis  
Pancreatitis acute  
Pancreatitis necrotising  
Panniculitis  
Papillitis  
Parotitis  
Periarthritis  
Pericarditis constrictive  
Periostitis  
Plantar fasciitis  
Pleuropericarditis  
Pneumonitis  
Polyarthritis  
Proctitis  
Pseudomembranous colitis  
Rhinitis  
Rhinitis allergic  
Scrotal dermatitis  
Seborrhoeic dermatitis  
Seronegative arthritis  
Serositis  
Sialoadenitis  
Spinal osteoarthritis  
Synovitis  
Tendonitis  
Tenosynovitis  
Thrombophlebitis  
Thrombophlebitis migrans  
Thyroiditis acute  
Thyroiditis subacute  
Tubulointerstitial nephritis  
Ulcerative gastritis  
Vestibular neuronitis  
Vulvitis

*Abbreviations:* MedDRA, Medical Dictionary for Regulatory Activities

**Supplementary Table 2** Spectrum of the clinical presentations of late-onset immune-related adverse events by organ toxicity

| <b>Organ toxicity</b>     | <b>Clinical presentation (MedDRA preferred terms)</b> | <b>N</b>    |
|---------------------------|-------------------------------------------------------|-------------|
| <b>Endocrine</b>          | thyroiditis                                           | 45          |
|                           | diabetes mellitus                                     | 20          |
|                           | hypophysitis                                          | 17          |
|                           | adrenalitis                                           | 2           |
| <b>Gastrointestinal</b>   | colitis                                               | 30          |
|                           | pancreatitis                                          | 15          |
|                           | enterocolitis                                         | 10          |
|                           | gastritis                                             | 9           |
|                           | cholangitis                                           | 2           |
|                           | cholecystitis                                         | 2           |
|                           | diverticulitis                                        | 2           |
|                           | duodenitis                                            | 1           |
|                           | oesophagitis                                          | 1           |
|                           | <b>Respiratory</b>                                    | pneumonitis |
| interstitial lung disease |                                                       | 25          |
| nasopharyngitis           |                                                       | 4           |
| rhinitis                  |                                                       | 1           |
| <b>Skin</b>               | vitiligo                                              | 19          |
|                           | pemphigoid                                            | 7           |
|                           | dermatitis                                            | 4           |
|                           | psoriasis                                             | 4           |
|                           | panniculitis                                          | 2           |
|                           | cellulitis                                            | 2           |
|                           | cutaneous lupus                                       | 2           |
|                           | dermo-hypodermitis                                    | 1           |
|                           | erythema multiforme                                   | 1           |
|                           | erythema nodosum                                      | 1           |
|                           | folliculitis                                          | 1           |
|                           | lichen planus                                         | 1           |
|                           | <b>Neurologic</b>                                     | neuropathy  |
| myelitis                  |                                                       | 3           |
| encephalitis              |                                                       | 2           |
| encephalopathy            |                                                       | 2           |
| myasthenia                |                                                       | 2           |

|                        |                                               |    |
|------------------------|-----------------------------------------------|----|
|                        | neuritis                                      | 1  |
| <b>Hepatic</b>         | hepatitis                                     | 23 |
| <b>Musculoskeletal</b> | arthritis                                     | 11 |
|                        | polymyalgia rheumatica                        | 4  |
|                        | fasciitis                                     | 2  |
|                        | myositis                                      | 2  |
|                        | osteitis deformans                            | 1  |
|                        | synovitis                                     | 1  |
|                        | tendonitis                                    | 1  |
| <b>Eye</b>             | uveitis                                       | 4  |
|                        | conjunctivitis                                | 2  |
|                        | iridocyclitis                                 | 1  |
|                        | iritis                                        | 1  |
|                        | keratitis                                     | 1  |
| <b>Renal</b>           | nephritis                                     | 8  |
|                        | cystitis                                      | 1  |
| <b>Cardiac</b>         | myocarditis                                   | 5  |
|                        | pericarditis                                  | 3  |
| <b>Other</b>           | immune-mediated adverse reaction              | 2  |
|                        | anti-actin antibody positive                  | 1  |
|                        | anti-neutrophil cytoplasmic antibody positive | 1  |
|                        | autoinflammatory disease                      | 1  |
|                        | serositis                                     | 1  |
|                        | smooth muscle antibody positive               | 1  |
| <b>Blood</b>           | anaemia                                       | 2  |
|                        | thrombocytopenia                              | 2  |
|                        | neutropenia                                   | 1  |
| <b>Vascular</b>        | vasculitis                                    | 4  |
|                        | lymphagitis                                   | 1  |
| <b>Immune</b>          | sarcoidosis                                   | 2  |
|                        | Sjogren's syndrome                            | 1  |
|                        | thrombocytopenic purpura                      | 1  |

*Abbreviations:* MedDRA, Medical Dictionary for Regulatory Activities
